# Supplementary material
Source: HighWire-hosted journal article supplement (https://tech.snmjournals.org/highwire/filestream/8636/field_highwire_adjunct_files/0/114413_Supplemental_Data.pdf)

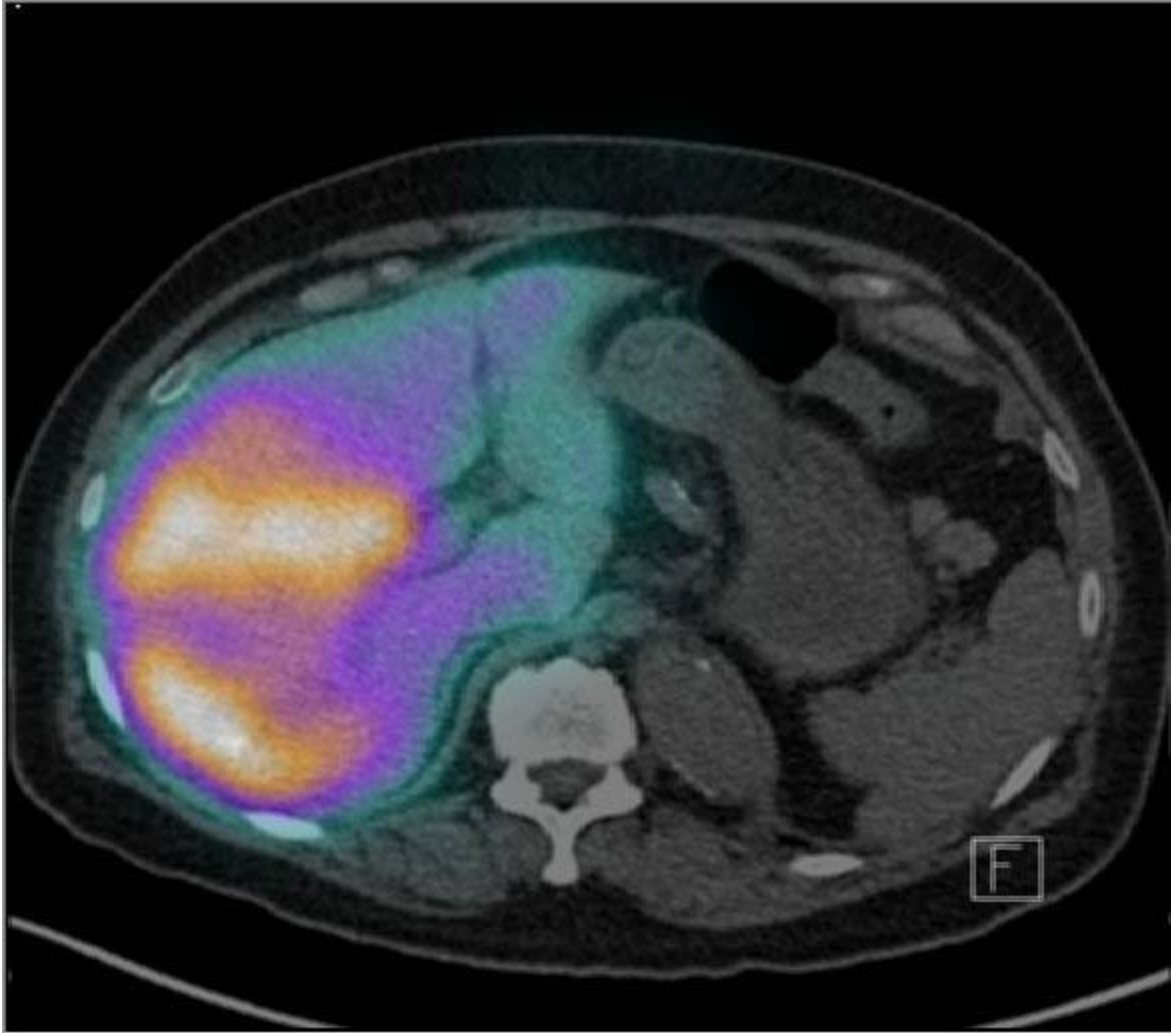

Color version of Figure 1.

Supplement: 114413_Supplemental_Data.pdf [file 114413_Supplemental_Data.pdf]
